# Supplementary material for: A SNP in the ABCC11 gene is the determinant of human earwax type
Source: Springer Nature journal article supplement (doi:10.1038/ng1733), 2006-01-29
Supplement: 41588_2006_BFng1733_MOESM1_ESM.pdf [file 41588_2006_BFng1733_MOESM1_ESM.pdf]

**Supplementary table 1.** Three-locus genotypes of 118 and 126 Japanese whose earwax types were self-declared and diagnosed otologically, and who underwent the first- and second-step association analyses, respectively

| Association study | Number of samples | Earwax type | Genotypes at rs17822931/rs6500380/ss49784070 |          |          |
|-------------------|-------------------|-------------|----------------------------------------------|----------|----------|
|                   |                   |             | GG/GG/GG                                     | GA/GA/GA | AA/AA/AA |
| First-step        | 118               | Wet         | 6                                            | 33       | 15       |
|                   |                   | Dry         | 0                                            | 1        | 63       |
| Second-step       | 126               | Wet         | 4                                            | 34       | 0        |
|                   |                   | Dry         | 0                                            | 1        | 87       |
