# Supplementary material for: A SNP in the ABCC11 gene is the determinant of human earwax type
Source: Springer Nature journal article supplement (doi:10.1038/ng1733), 2006-01-29
Supplement: 41588_2006_BFng1733_MOESM2_ESM.pdf [file 41588_2006_BFng1733_MOESM2_ESM.pdf]

**Supplementary table 2.** Genotypes at the rs17822931 site and frequencies of alleles “A” and  $\Delta 27$  in *ABCC11* and of dry cerumen among different human populations

| Ethnic groups   | Present study                    |     |    |                                 |                         |                                 | Previous study                                  |                               |           |
|-----------------|----------------------------------|-----|----|---------------------------------|-------------------------|---------------------------------|-------------------------------------------------|-------------------------------|-----------|
|                 | No. of individuals with genotype |     |    | Number of individuals genotyped | Frequency of allele “A” | Frequency of allele $\Delta 27$ | Tribes or inhabitants examined [Sources of DNA] | Frequency of dry type cerumen | Reference |
|                 | AA (Frequency)                   | GA  | GG |                                 |                         |                                 |                                                 |                               |           |
| Korean          | 99 (1.000)                       | 0   | 0  | 99                              | 1.000                   | 0/190                           | Taegu city inhabitants [6]                      | 0.924                         | [15]      |
| Yukaghir        |                                  |     |    |                                 |                         |                                 | Paleo-Siberian                                  | 1.000                         | [23]      |
| Nivkh           |                                  |     |    |                                 |                         |                                 | Sahalin Island                                  | 0.968                         | [23]      |
| Chinese         | 74 (1.000)                       | 0   | 0  | 74                              | 1.000                   |                                 | Northern Han Chinese (Shanxi) [1]               | 0.958                         | [15]      |
|                 | 110 (0.924)                      | 9   | 0  | 119                             | 0.962                   |                                 | Northern Han Chinese (Jingsu) [1]               |                               |           |
|                 | 42 (0.808)                       | 10  | 0  | 52                              | 0.904                   | 0/104                           | Han Chinese from multi-regions [7]              |                               |           |
|                 | 93 (0.788)                       | 21  | 4  | 118                             | 0.877                   |                                 | Southern Han Chinese (Fujian) [1]               |                               |           |
|                 | 76 (0.685)                       | 33  | 2  | 111                             | 0.833                   |                                 | Southern Han Chinese (Guangdong) [1]            |                               |           |
|                 | 80 (0.777)                       | 9   | 2  | 103                             | 0.820                   |                                 | Southern Han Chinese (Hunan) [1]                |                               |           |
|                 |                                  |     |    |                                 |                         |                                 | Southern Chinese (Hoklo and Hakka)              | 0.740                         | [15]      |
|                 |                                  |     |    |                                 |                         | Li Chinese in Hainan Island     | 0.446                                           | [15]                          |           |
| Tibetan         |                                  |     |    |                                 |                         |                                 |                                                 | 0.957                         | [20]      |
| Tungus          |                                  |     |    |                                 |                         |                                 |                                                 | 0.906                         | [15]      |
| Mongolian       | 126 (0.759)                      | 36  | 4  | 166                             | 0.867                   | 0/252                           | Khalkha tribe [2][8]                            | 0.879                         | [15]      |
| Japanese        |                                  |     |    |                                 |                         |                                 | From all Japan                                  | 0.837                         | [15]      |
|                 | 87 (0.690)                       | 35* | 4  | 126                             | 0.829                   | 1/668                           | Nagasaki inhabitants [6]                        |                               |           |
|                 | 30 (0.517)                       | 25  | 3  | 58                              | 0.733                   |                                 | Propel of Okinawa [9]                           | 0.663                         | [15]      |
|                 | 13 (0.433)                       | 15  | 2  | 30                              | 0.683                   | 0/60                            | Yonakuni Islander [3]                           | 0.671                         | [15]      |
|                 |                                  |     |    |                                 |                         |                                 | Ainu in Shiraoi village, Hokkaido               | 0.133                         | [15]      |
|                 | 31 (0.534)                       | 23  | 2  | 58                              | 0.733                   |                                 | Ainu in Nibutani village, Hokkaido [2][6]       |                               |           |
| Yakut           |                                  |     |    |                                 |                         |                                 | Eastern Siberia                                 | 0.786                         | [23]      |
| Altai people    |                                  |     |    |                                 |                         |                                 | The Altai                                       | 0.670                         | [23]      |
| Vietnamese      | 82 (0.536)                       | 60  | 11 | 153                             | 0.732                   |                                 | from multi-regions of Vietnam [5]               |                               |           |
| Dravidian       | 27 (0.540)                       | 17  | 6  | 50                              | 0.710                   | 0/100                           | Inhabitants of Tamil Nadu in India [2]          |                               |           |
| Native Canadian |                                  |     |    |                                 |                         |                                 |                                                 | 0.570                         | [18]      |
| Inuit           |                                  |     |    |                                 |                         |                                 | Alaska in USA                                   | 0.515                         | [23]      |
| Alute           |                                  |     |    |                                 |                         |                                 |                                                 | 0.486                         | [23]      |
| Kirghiz         |                                  |     |    |                                 |                         |                                 | Murgab                                          | 0.409                         | [23]      |
| Thai            | 25 (0.521)                       | 17  | 6  | 48                              | 0.698                   |                                 | Northern Thai (Lahu tribe) [2]                  |                               |           |
|                 | 13 (0.271)                       | 25  | 10 | 48                              | 0.531                   |                                 | Northern Thai (Shan tribe) [2]                  |                               |           |
|                 | 27 (0.563)                       | 18  | 3  | 48                              | 0.750                   |                                 | Northern Thai (Lisu tribe) [2]                  |                               |           |

|                       |            |    |    |     |       |       |                                      |       |          |
|-----------------------|------------|----|----|-----|-------|-------|--------------------------------------|-------|----------|
|                       | 66 (0.516) | 51 | 11 | 128 | 0.457 |       | Mae-sot Thai (Karen tribe) [2][5]    |       |          |
|                       | 35 (0.729) | 10 | 3  | 48  | 0.833 |       | Northern Thai (Hmong tribe) [2]      |       |          |
|                       | 25 (0.510) | 18 | 6  | 49  | 0.694 |       | Northern Thai (Akha tribe) [2]       |       |          |
|                       | 24 (0.421) | 24 | 9  | 57  | 0.632 |       | Northern Thai (Mlabri tribe) [2]     |       |          |
|                       | 1 (0.020)  | 10 | 40 | 51  | 0.118 |       | Southern Thai (Urak Lawoi tribe) [2] |       |          |
|                       | 1 (0.038)  | 13 | 12 | 26  | 0.288 | 0/52  | Southern Thai (Sakai tribe) [2]      |       |          |
|                       | 31 (0.633) | 10 | 8  | 49  | 0.735 | 1/100 | Central Thai in Bangkok [2]          |       |          |
| Taiwanese             |            |    |    |     |       |       | From all Taiwan                      | 0.286 | [22]     |
|                       | 22 (0.423) | 24 | 6  | 52  | 0.654 |       | Taiwan Aborigine (Yami) [2]          |       |          |
|                       | 12 (0.235) | 24 | 15 | 51  | 0.471 |       | Taiwan Aborigine (Ami) [2]           | 0.252 | [15]     |
| Vedda                 | 7 (0.350)  | 12 | 1  | 20  | 0.650 |       | Native people in Sri Lanka [2]       |       |          |
| Indonesian            | 12 (0.293) | 23 | 9  | 41  | 0.573 |       | Dayak tribe in Kalimantan [2]        |       |          |
|                       | 17 (0.347) | 20 | 12 | 49  | 0.551 |       | Toraja tribe in Sulawesi [2]         |       |          |
|                       | 18 (0.300) | 25 | 17 | 60  | 0.508 |       | Floresian [2]                        |       |          |
|                       | 10 (0.196) | 29 | 12 | 51  | 0.480 |       | Bugis tribe in Sulawesi [2]          |       |          |
|                       | 9 (0.180)  | 16 | 25 | 50  | 0.340 |       | Sumbanese [2]                        |       |          |
|                       | 0 (0.000)  | 2  | 31 | 33  | 0.030 |       | Dani tribe in Irian Jaya [2]         |       |          |
| Malaysian             | 24 (0.393) | 27 | 10 | 61  | 0.566 | 0/132 | Sabah in North Borneo [4]            |       |          |
|                       | 8 (0.113)  | 40 | 23 | 71  | 0.394 | 0/138 | Bentong tribe [4]                    | 0.343 | [15][19] |
|                       |            |    |    |     |       |       | Oran Asli, Aborigine                 | 0.068 | [19]     |
| Native North American | 6 (0.300)  | 8† | 6  | 20  | 0.500 | 2/40  | [10]                                 | 0.362 | [17]     |
| Philippino            | 11 (0.229) | 23 | 14 | 48  | 0.469 |       | Palawan [2]                          |       |          |
| Easter Islander       | 4 (0.138)  | 18 | 7  | 29  | 0.448 |       | [3]                                  |       |          |
| Bolivian              | 5 (0.167)  | 14 | 11 | 30  | 0.400 | 9/60  | Aymara inhabitants [3]               |       |          |
| Kazakh                | 6 (0.200)  | 11 | 13 | 30  | 0.383 |       | Aktyubinsk                           | 0.405 | [23]     |
| Native Paraguayan     | 2 (0.040)  | 34 | 14 | 50  | 0.380 | 0/98  | Ayoreos village [4]                  |       |          |
|                       | 0 (0.000)  | 14 | 61 | 75  | 0.093 | 0/150 | Sanapana village [4]                 |       |          |
| Micronesian           |            |    |    |     |       |       | Ponape, Truk, and Yap                | 0.371 | [15]     |
| Turkoman              |            |    |    |     |       |       |                                      | 0.333 | [19]     |
| Bashkir               |            |    |    |     |       |       | Uzunlarovo and Assy                  | 0.380 | [23]     |
| Melanesian            |            |    |    |     |       |       |                                      | 0.278 | [15]     |
| Turkish               |            |    |    |     |       |       |                                      | 0.276 | [19]     |
| Aryo-Indian           |            |    |    |     |       |       | All parts of India                   | 0.229 | [19]     |
| Afghan people         |            |    |    |     |       |       |                                      | 0.154 | [19]     |
| Pamiri                |            |    |    |     |       |       |                                      | 0.136 | [23]     |
| Finnic                |            |    |    |     |       |       | Mariy                                | 0.093 | [23]     |
| Estonian              |            |    |    |     |       |       | Tallinn                              | 0.058 | [23]     |
| Latvian               |            |    |    |     |       |       | Riga                                 | 0.036 | [23]     |
| Russian               | 5 (0.045)  | 45 | 62 | 112 | 0.246 | 0/208 | [11]                                 |       |          |
| Solomon Islander      | 2 (0.323)  | 25 | 35 | 62  | 0.234 | 0/122 | [4]                                  |       |          |

|                             |           |    |    |    |       |       |                                                                |       |      |
|-----------------------------|-----------|----|----|----|-------|-------|----------------------------------------------------------------|-------|------|
| Pacific islander            | 1 (0.143) | 1  | 5  | 7  | 0.214 | 0/14  | [13]                                                           |       |      |
| French                      | 1 (0.083) | 3  | 8  | 12 | 0.208 | 0/24  | From the CEPH families [14]                                    |       |      |
| Andes people                | 1 (0.100) | 2  | 7  | 10 | 0.200 | 1/20  | [13]                                                           |       |      |
| Hungarian                   | 0 (0.000) | 4  | 6  | 10 | 0.200 | 0/20  | [13]                                                           |       |      |
| Jew                         | 0 (0.000) | 4  | 6  | 10 | 0.200 | 0/20  | Ashkenazi [13]                                                 |       |      |
| Ukrainian                   | 0 (0.000) | 15 | 27 | 42 | 0.179 | 0/84  | [6]                                                            |       |      |
| Australian Aborigine        |           |    |    |    |       |       |                                                                | 0.032 | [22] |
| Lithuanian                  |           |    |    |    |       |       | Vilnius inhabitants                                            | 0.031 | [23] |
| German                      |           |    |    |    |       |       |                                                                | 0.031 | [15] |
| Papuan                      | 1 (0.026) | 11 | 26 | 38 | 0.171 | 0/68  | Papua New Guinea [2]                                           |       |      |
| Melanesian                  |           |    |    |    |       |       | Waffa, New Guinea                                              | 0.000 | [22] |
| Vanuatu islander            | 1 (0.022) | 8  | 36 | 45 | 0.111 |       | Aneityum Island [4]                                            |       |      |
|                             | 0 (0.000) | 9  | 38 | 47 | 0.096 |       | Santo Island [4]                                               |       |      |
|                             |           |    |    |    |       | 0/266 | Any and Gau islanders [4]                                      |       |      |
| American of European origin | 1 (0.012) | 16 | 65 | 82 | 0.110 | 0/164 | from the CEPH families without the French and Venezuelans [14] | 0.013 | [17] |
| Venezuelan                  | 0 (0.000) | 3  | 11 | 14 | 0.107 | 0/28  | Ye'Kuana village [3]                                           |       |      |
|                             | 0 (0.000) | 0  | 18 | 18 | 0.000 | 0/64  | Sanuma [3]                                                     |       |      |
| Iberian                     | 0 (0.000) | 2  | 8  | 10 | 0.100 |       | [13]                                                           |       |      |
| Columbian                   | 0 (0.000) | 2  | 15 | 17 | 0.059 | 0/34  | [3]                                                            |       |      |
| African                     | 0 (0.000) | 1  | 10 | 11 | 0.047 | 0/22  | from various sub-Saharan nations [12]                          |       |      |
| American of African origin  | 0 (0.000) | 0  | 10 | 10 | 0.000 | 0/20  | [13]                                                           | 0.000 | [17] |

[1] Collection by N. Saitou; [2] Collection by T. Ishida; [3] Collection by S. Sonoda; [4] Collection by K. Hirayama; [5] Collection by N. Natsume; [6] Collection by N. Niikawa; [7] Collection by D-S. Liang; [8] Collection by A. Garidkhuu; [9] Collection by T. Kaname; [10] Collection by R. Komaki; [11] Collection by V. A. Saenko; [12] Collection by C. K. Mapendano; [13] from the Coriell Institute; [14] from the CEPH families;

[15] Matsunaga E., *Ann Hum Genet.* 25,273-286, 1962; [16] Norakmal and Tan, *Jpn. J. Hum. Genet.* 24, 119-121, 1979; [17] Petrakis et al., 1969; [18] Alfred et al., *Am. J. Phys. Anthropol.* 32, 329-338, 1970; [19] Petrakis, *Science* 173, 347-349, 1971; [20] Patel, *Am. J. Phys. Anthropol.*, 35,755-756, 1973; [21] Bass and Jackson, *Am. J. Phys. Anthropol.*, 47, 209-210, 1977; [22] Omoto, *Israel J. Med. Sci.*, 9, 1195-1215, 1973; [23] Spitsyn and Afanasèva, *Genetiks (Russian)* 25, 1854-1860, 1989.

\*One exceptional case of dry cerumen who has  $\Delta 27$  in *ABCC11* is included.
