# Supplementary material for: A SNP in the ABCC11 gene is the determinant of human earwax type
Source: Springer Nature journal article supplement (doi:10.1038/ng1733), 2006-01-29
Supplement: 41588_2006_BFng1733_MOESM3_ESM.pdf [file 41588_2006_BFng1733_MOESM3_ESM.pdf]

**Supplementary table 3.** Inferred haplotypes' frequencies at three polymorphic loci (rs17822931-rs6500380-ss49784070) in the Japanese (Nagasaki inhabitants), Southern Han Chinese (Changsha inhabitants), Native Americans, Native Bolivians, and the CEPH families of European origin.

| Populations         | Haplotypes (%) |       |       |       |
|---------------------|----------------|-------|-------|-------|
|                     | A-A-A          | G-G-G | G-A-A | A-G-G |
| Japanese            | 0.83           | 0.17  | 0.00  | 0.00  |
| Southern Chinese    | 0.90           | 0.07  | 0.03  | 0.00  |
| Native Americans    | 0.50           | 0.45  | 0.05  | 0.00  |
| Native Bolivians    | 0.47           | 0.40  | 0.13  | 0.00  |
| CEPH family members | 0.09           | 0.87  | 0.01  | 0.03  |
