# Supplementary material for: A SNP in the ABCC11 gene is the determinant of human earwax type
Source: Springer Nature journal article supplement (doi:10.1038/ng1733), 2006-01-29
Supplement: 41588_2006_BFng1733_MOESM4_ESM.pdf [file 41588_2006_BFng1733_MOESM4_ESM.pdf]

**Supplementary table 4.** Primer sequences for 24 SNPs that were used for haplotyping in a 600-kb interval and its flanking region

| Domestic_ID | dbSNP_ID   | Primer Sequence (5' -> 3')                            |
|-------------|------------|-------------------------------------------------------|
| B41250      | rs888339   | GAGGCAGGATAAGTTCATTTTAT<br>GGCTTCAAAGAGAGCATCACG      |
| B58370      | ss49784055 | GTTCAACCAATAGTAACTAGTC<br>AATGAAACTTGCAAGGCATAGT      |
| B81540.1*   | ss49784051 | TAGGGTCAACATTTAAAGAGAA                                |
| B81540.2*   | ss49784052 | CTTGTTTCATACCTTGACAAGAGC                              |
| B158110     | rs496359   | CTTGTACCTGAGACCCAGGAC<br>GAACAGCTCTGAGCCCAGTTCA       |
| B217050     | ss49784062 | TAATCCATTAGCTGGGTCTGCC<br>TAGAGGTCCTGGCGGCTGATT       |
| B333740     | ss49784065 | CCAGCACAAAAATCTTCTACCA<br>GACATGGTGCCTTTTACTGCCTG     |
| B344400     | ss49784066 | GCACCTGGCCAAGCTCCTAGC<br>GCTGGAGAGGAACGGGCATGCT       |
| B347380     | ss49784067 | AAAATCATAAAGTGTATACAGGAAT<br>CTATAGTCACAGTGCAGCATG    |
| B404940     | ss49784068 | CTGATGGAAATTGCCTTGGGA<br>AGTTTCTGAAACAGTTTCCCATC      |
| B414730     | ss49784069 | TCCTGAGAGTTTGGAGACCCA<br>CTTGCCCAAATTCTACTGCCTAC      |
| B475340     | rs6500380  | AGGAACAGTATCATAGGTCAC<br>CCATGCAGGCTCCCTGAAGCAG       |
| B482500     | ss49784070 | TATGCCTGTA ACTAATTCATATTT<br>AACAAATTTGTCAAGTAGAACAAG |
| B493890     | ss49784071 | GGAAAGACTAATCCAGAGGCCAT<br>AAATCTTACTGTGTCTGCTTTAGC   |
| B499900     | rs12928880 | TTCTCCAGATTC ACTGGGTAGG<br>CCCACCCTTGCGCGAGCAAGA      |

|                  |            |                                                    |
|------------------|------------|----------------------------------------------------|
| B501360          | ss49784072 | AGATGCCTTAACCTTGCAAAG<br>CTATATAACCAAACCTGGGCTTGG  |
| B521140          | ss49784073 | GTTGACTCTGCTTCCTTGACAG<br>AGTAATTTACATCACTGGTACC   |
| B565600          | rs1105407  | GAACCAAAGACAAGTCGAGCAC<br>CTCTGACTCTGGAGAACAGGGAT  |
| B612860          | rs9941289  | TACCCTAATCCAGTCTGAGCCTG<br>GCTAAGAGGCTCAGAAGCACTC  |
| B631128          | rs2062555  | GGAATCCAGGACAGCCAAG<br>TGGGCCAGTTCTTCATCTGGGA      |
| B673603          | rs3743779  | AGTCCGCTTTCACTTGGTGGG<br>TTGCCTCACCCAGTTCCTGCAG    |
| B688180          | rs3785138  | AGGTGGTAATTTGTCTACTCAT<br>AGTTTCACTGGAATTTGCAGGG   |
| B-690190         | rs3785137  | ACACCTTGCTACTTATGGGAAG<br>ACTTTCCATTGTCCCCACACTG   |
| B708959          | rs3859121  | TATCTGGACATTTTAAATGTTAG<br>AGATGCTGAGTAGTGGTGTGAAG |
| $\Delta 27^{\#}$ |            | CATCAGATCATCCTTATCGATG<br>CACAGTTCAGCACAGTGGTGA    |

---

\* B81540.1 and B81540.2 was within a single PCR product.

<sup>#</sup> A primer set amplifies 143-bp and 116-bp products from wild-type and deletion alleles, respectively.
